# Supplementary material
Source: Springer Nature journal article supplement (https://www.springermedizin.de/resource/supplementary/12913_2013_3027_MOESM1_ESM.pdf/9533366)
Supplement: MOESM1 [file 9533366]

Need identified for Integrated SRH/HIV  
and Capacity-Building Programme

Advocacy meetings held;  
financial and political support garnered

Situation analysis

Materials, tools, and supplies developed and collected

Development of  
Mentorship Programme

National, county and district level

Mentors selected

Mentor Induction Workshop  
5 days

Mentorship Programme with mentees  
3 to 6 months

Facility managers support and supervise

Mentorship Programme  
implementation

County and facility level

Mentee–Mentor internal evaluation

Mentee assessment and certification

Programme evaluation

Dissemination of results

Mentorship Programme  
assessment and  
evaluation

National, county, and  
facility level
